# Supplementary material
Source: publisher figshare collection journal article supplement (https://tandf.figshare.com/ndownloader/files/22078560)
Supplement: Supplementary file 1 [file 22078560]

**Appendix 1: search strategy**

(("Drug Substitution"[Mesh] OR pathogen directed[tw] OR small spectrum[tw] OR narrow spectrum[tw] OR (tailored[tw] AND (therapy[tw] OR therapies[tw] OR treatment*[tw])) OR ((broad[tw] OR empiric*[tw]) AND (narrow[tw] OR change*[tw] OR switch*[tw] OR substitut*[tw])) OR streamlin*[tw] or de-escalat*[tw]) AND ((("Anti-Bacterial Agents"[Mesh] OR "Anti-Bacterial Agents" [Pharmacological Action] OR "Antifungal Agents"[Mesh] OR "Antifungal Agents" [Pharmacological Action] OR anti-bacterial*[tw] OR antibacterial*[tw] OR anti-mycobacterial*[tw] OR antimycobacterial*[tw] OR antibiotic*[tiab] OR anti-infective[tiab] OR antifungal[tiab] OR anti-fungal[tiab] OR bactericid*[tw] OR bacteriocid*[tw]) AND ("Outcome Assessment (Health Care)"[Mesh] OR outcome*[tw] OR "Drug-Related Side Effects and Adverse Reactions"[Mesh] OR "adverse effects" [Subheading] OR adverse effect*[tw] OR adverse reaction*[tw] OR adverse drug reaction*[tw] OR adverse event*[tw] OR adverse drug event*[tw] OR undesirable effect*[tw] OR side effect*[tw] OR "Mortality"[Mesh] OR mortalit*[tw] OR "mortality"[Subheading] OR death*[tw] OR fatal*[tw] OR "Morbidity"[Mesh:NoExp] OR morbidit*[tw] OR "Drug Resistance"[Mesh] OR resistan*[tw] OR "Costs and Cost Analysis"[Mesh] OR cost*[tw])) NOT case reports[pt]) NOT ("HIV Infections"[Mesh] OR HIV[Mesh] OR HIV[ti] OR human immunodeficiency virus[ti])) AND 2014/04:2019/02 [edat]))
